# Supplementary material for: Body height and waist circumference of young Swiss men as assessed by 3D laser-based photonic scans and by manual anthropometric measurements
Source: PeerJ journal article supplement (doi:10.7717/peerj.8095), 2019-12-12

WC

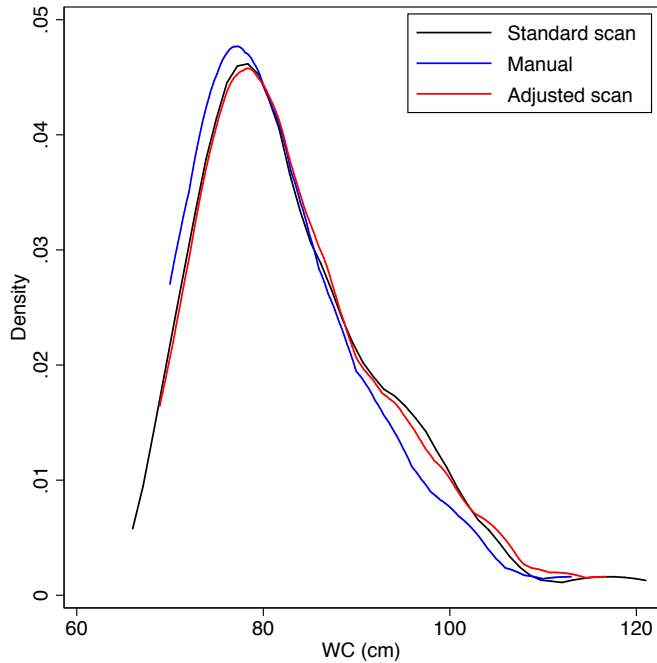

Height

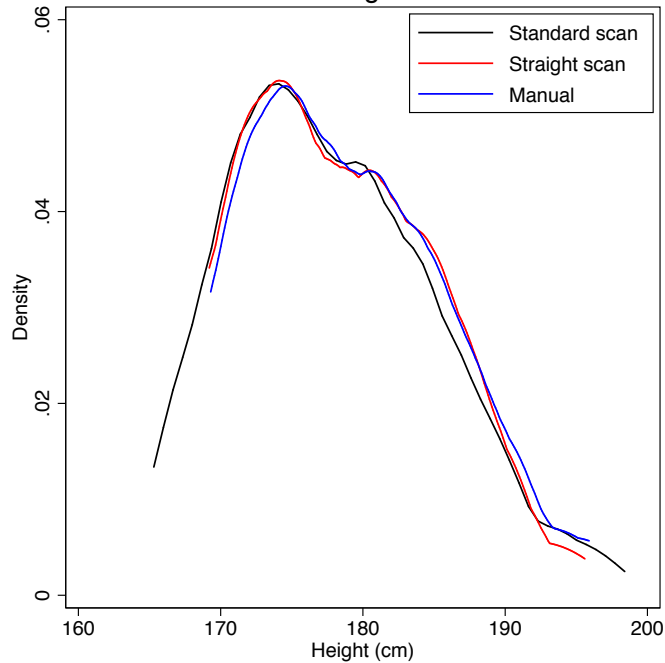

BMI

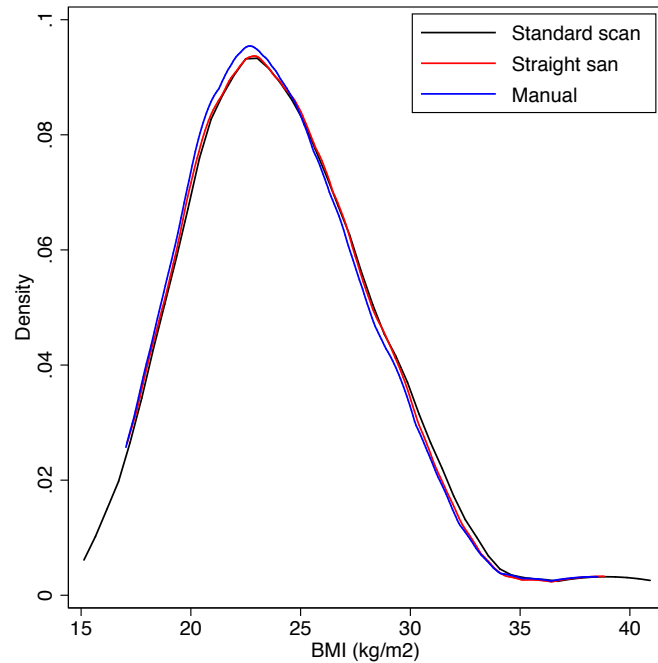

Supplement: Supplementary_Figure_2.pdf [file Supplementary_Figure_2.pdf]
